# Supplementary material
Source: PubMed Central journal article supplement (PMC7269588)
Supplement: jci-130-130571-s336.pdf [file jci-130-130571-s336.pdf]

1 **Glibenclamide reverses cardiovascular abnormalities of Cantu Syndrome driven by  $K_{ATP}$  channel**  
2 **overactivity**

3 Conor McClenaghan, Yan Huang, Zihan Yan, Theresa Harter, Carmen M. Halabi, Rod Chalk,  
4 Attila Kovacs, Gijs van Haaften, Maria S. Remedi, and Colin G. Nichols

5 **SUPPLEMENTARY METHODS**

6 *Generation of mouse models*

7 As previously described (1), CRISPR-Cas9 genome editing was used to introduce a single  
8 nucleotide mutation into *ABCC9* (c.1427C>T), generating the equivalent of human CS-  
9 associated SUR2[A478V] mutation. Heterozygous SUR2[A478V] ( $SUR2^{wt/AV}$ ) mice were in-  
10 crossed to generate mutant and WT littermate mice used for experiments.

11 To generate mice expressing the SUR2[A478V] mutation and dominant negative (DN) Kir6.1-  
12 AAA in an inducible, tissue-specific, manner we crossed Tg[CX1-eGFP-Kir6.1-AAA] (6.1-AAA)  
13 mice (2) with transgenic mice (SM-Cre) that express inducible Cre recombinase ( $CreER^{T2}$ )  
14 driven by the SMMHC promoter (3) (Figure 1A). These double-transgenic mice were then  
15 crossed with  $SUR2^{wt/A478V}$  mice to generate double-transgenic CS mice ( $SM-DN^{wt/AV}$ ), and  
16 double-transgenic mice lacking the SUR2[A478V] mutation ( $SM-DN^{wt/wt}$ ), as well as wild type,  
17 CS ( $SUR2^{wt/AV}$ ), and additional uninducible single transgenic (STG) control animals. Eight week  
18 old mice of all genotypes were treated with serial tamoxifen injections (1 injection of 50  $\mu$ g/g  
19 body weight per day for 5 days), which induced dominant-negative Kir6.1-AAA expression in  
20  $SM-DN^{wt/AV}$  and  $SM-DN^{wt/wt}$  animals, and experiments were performed 4 weeks after induction.  
21 Experimental groups included male and female mice for all comparisons, except for SMMHC-  
22 Cre dominant-negative mice which were male only, as the transgene is carried on the Y  
23 chromosome.

24

25 *Patch clamp electrophysiology of VSM cells*

26 VSM cells were acutely isolated from descending aorta as described (1).  $K_{ATP}$  currents were  
27 recorded in whole-cell mode using an Axopatch 200B amplifier and Digidata 1322A (Molecular  
28 Devices). Data were sampled at 3 kHz and low-pass filtered at 1 kHz. Cells were voltage-  
29 clamped at -70 mV and currents were initially recorded in a high  $Na^+$  bath solution containing (in  
30 mM): 136 NaCl, 6 KCl, 2  $CaCl_2$ , 1  $MgCl_2$ , 10 HEPES, and 10 glucose (pH 7.4) before exchange  
31 with a high- $K^+$  bath solution (140 KCl, 2  $CaCl_2$ , 1  $MgCl_2$ , 10 HEPES, and 10 glucose, pH 7.4).  
32 Pinacidil and glibenclamide were then administered as indicated. The pipette solution contained  
33 (in mM) 110 potassium aspartate, 30 KCl, 10 NaCl, 1  $MgCl_2$ , 10 HEPES, 0.5  $CaCl_2$ , 4  $K_2HPO_4$ ,  
34 and 5 EGTA (pH 7.2).  $K_{ATP}$  current density was calculated by dividing whole cell currents in  
35 pinacidil by cell capacitance.

36

37 *Blood pressure measurements*

38 Adult mice (3 months old) were anesthetized using 1.5% isoflurane and body temperature was  
39 maintained with a heating pad throughout recordings. BPs were recorded following  
40 catheterization of the left carotid artery with a Millar pressure transducer advanced to the  
41 ascending aorta. Data were acquired using the Powerlab data acquisition system  
42 (ADInstruments), and MAP was analyzed using LabChart 7 (ADInstruments).

43

44 *Heart weight measurements*

45 Adult (3 months old) mice were euthanized using 2.5% Avertin (Tribromoethanol). Hearts were  
46 removed, rinsed in 10 % KCl solution and blotted to remove excess liquid and weighed. Heart  
47 weight was normalized to tibia length (HW/TL; mg/mm).

48

49 *Subcutaneous glibenclamide pellet implantation in mice*

50 8 week old mice were anesthetized with 2.5 % Avertin. Fur on the dorsal neck was trimmed and  
51 5 mg/kg carprofen was administered subcutaneously as a pre-operative analgesic. For an  
52 approximate glibenclamide dose of 1 mg/kg/day, 2.5 mg (90 day) slow-release pellets  
53 (Innovative Research of America) were implanted subcutaneously under the loose skin of the  
54 scruff of the neck using a trochar. High dose (approximately 19 mg/kg/day), 25mg (60 day)  
55 pellets (Innovative Research of America) were surgically implanted. In control mice, placebo  
56 pellets (5mg; 21 day release; Innovative Research of America), were implanted subcutaneously  
57 using a trochar. 4 weeks following pellet implantation BPs and heart size were measured.

58

59 *Echocardiography*

60 Echocardiography was performed using a Vevo 2100 Imaging System (VisualSonics) equipped  
61 with a 30-MHz linear-array transducer according to previously published methods (4, 5). Cardiac  
62 images were obtained by a handheld technique using 100 mg/kg i.p. tribromoethanol anesthetic;  
63 aortic images were obtained under 1.5% inhaled isoflurane. Quantitative image analysis was  
64 performed using a speckle-tracking algorithm to obtain volumetric data. Cardiac index was  
65 calculated by normalizing cardiac output (stroke volume x heart rate) by tibia length. Systemic  
66 vascular resistance was calculated from mice (> 20 g) by dividing mean arterial pressure  
67 (determined from catheter measurements from anesthetized mice) by cardiac output (in turn  
68 calculated from stroke volume measurements from echocardiographic data multiplied by heart  
69 rate measurements from blood pressure recordings). Mice administered with both moderate-  
70 and high-dose pellets were grouped together as glibenclamide-treated mice for SVR and  
71 cardiac index measurements.

72

73 *Histology*

74 Hearts were fixed in 10% buffered formalin (24 h), and embedded in paraffin. Sections (3  $\mu$ m)  
75 were cut and Gomori stained as previously reported(6). Left ventricle free-wall sections were  
76 imaged from placebo and high-dose glibenclamide treated WT and SUR2<sup>wt/AV</sup> mice (n of 3 for  
77 each group). No differences in collagen staining between any group were observed.

78

79 *Carotid artery compliance measurement*

80 After euthanasia, the left common carotid artery was excised and placed in physiologic  
81 saline solution (PSS) composed of 130 mM NaCl, 4.7 mM KCl, 1.6 mM CaCl<sub>2</sub>, 1.18 mM  
82 MgSO<sub>4</sub>-7H<sub>2</sub>O, 1.17 mM KH<sub>2</sub>PO<sub>4</sub>, 14.8 mM NaHCO<sub>3</sub>, 5.5 mM dextrose, and 0.026 mM  
83 EDTA (pH 7.4). The vessel was cleaned from surrounding fat, mounted on a pressure  
84 arteriograph (Danish Myotechnology, Aarhus, Denmark) and maintained in PSS at  
85 37°C. An inverted microscope connected to a charged-coupled device camera and a  
86 computerized system was used to visualize the artery and continuously record its  
87 diameter. As intravascular pressure was increased from 0 to 175 mm Hg by 25 mmHg  
88 increments, the vessel outer diameter was recorded at each step (12 seconds per step).  
89 The average of three measurements at each pressure was reported.

90

91

92 *Blood Glucose measurement in mice*

93 Blood glucose (BG) was measured from tail-bleed samples using a digital blood glucose meter  
94 (Contour). BG was measured in fed mice (food available *ad libitum*) prior to pellet implantation  
95 and then periodically over 18 days post-implantation. To assess fasted blood glucose and for  
96 glucose-tolerance tests (GTT), food was removed overnight (for ~ 10h) and BG measured the

97 following morning. GTT was performed by measuring blood glucose from tail bleed samples  
98 immediately prior to administration of 1.5 g/kg D-glucose (in PBS), injected I.P.

99

#### 100 *LC-MS/MS analysis of plasma glibenclamide concentrations*

101 60µl of mouse plasma was spiked with d11 glibenclamide and diluted to 1ml with 2% acetonitrile,  
102 0.1 % formic acid prior to solid phase extraction. Eluted samples were evaporated, re-suspended  
103 in ammonium formate buffer and then subjected LC-MS/MS analysis using an ion trap mass  
104 spectrometer following the method described by Lahmann et al. (7). Six experimental replicates  
105 were performed and concentrations were determined with reference to a glibenclamide standard  
106 curve.

107 Preparation of glibenclamide standards: For the glibenclamide calibration standards, a stock  
108 solution of glibenclamide (Santa Cruz Biotechnology) was dissolved in methanol (1mg/ml).  
109 Mouse plasma was spiked with the stock glibenclamide solution, and using serial dilutions the  
110 following standards were prepared: no drug, 1 ng/ml, 5 ng/ml, 10 ng/ml, 20 ng/ml, 30 ng/ml, 40  
111 ng/ml, 50 ng/ml, 100 ng/ml 150 ng/ml. Quality control (QC) samples were also prepared at 50  
112 ng/ml . Deuterated glibenclamide (d11-glibenclamide, Santa Cruz Biotechnology) was used as  
113 the internal standard, and was added at a concentration of 333 ng/ml into all the calibration, QC  
114 and study samples.

115 Study sample preparation and extraction: Study plasma samples (8 from low-dose and 8 from  
116 high-dose pellet-implanted mice) were thawed and centrifuged at 14,000 x g for 10 minutes prior  
117 to use, and 60µl was added to 20µl of internal standard (at 1µg/ml) and acidified with 80µl of 4%  
118 orthophosphoric acid (from 85% w/w stock). The samples were then diluted by adding 800 µl of  
119 buffer A (2% ACN, 0.1% FA), processed by reverse phase solid phase extraction (C18-SPE,  
120 Biotage Isolute C18). Samples were washed with a further 1 ml buffer A followed by 1 ml 10 %

121 ACN and then eluted using two volumes of 150 µl buffer B (80% ACN, 0.1% FA) The eluates  
122 were then transferred to labelled 1.5 ml Eppendorf tubes and evaporated using a Rotovac  
123 vacuum centrifuge at 35oC for 1-2 hours. The residue was re-suspended in 12µl of 100%  
124 methanol and 48µl of 0.5 mM ammonium formate using an ultrasonic bath for 10 minutes.  
125 Finally, the samples were centrifuged for 10 minutes and the supernatant was transferred to the  
126 liquid chromatography tandem-mass spectrometry (LC-MS/MS) instrument.

127 Liquid chromatography tandem-mass spectrometry: LC-MSMS was performed using a Dionex  
128 U3000 nano HPLC coupled to a Bruker Esquire HTC ion trap mass spectrometer.

129 Chromatographic separation was performed using a 50 mm x 2.1 mm, 2.6µm Accucore™ C18  
130 RP column and pre-column (ThermoFisher Scientific). A gradient of 20-35 % B was developed

131 over 1 minute, then 35-90 % B over 5 minutes, followed by isocratic elution at 90 % B for 3  
132 minutes and equilibration at 20 % B for 2 minutes at 200 µl/min flow rate. The mass

133 spectrometer was operated in positive ion mode with a scan range 300-600 m/z and scan speed  
134 26,000 m/z/sec. The source parameters were: nebuliser gas 10 psi, drying gas 5 l/min, drying

135 gas temperature 300oC, capillary voltage 4000V. MRM parameters were programmed for  
136 transition 494.4 m/z to 369.0 m/z (glibenclamide) and transition 505.1 m/z to 369.0 m/z (d11

137 glibenclamide) with isolation widths 3 Da and 4 Da respectively. Sample injection volume was 2  
138 µl. Six replicates of all samples were performed each preceded by a blank injection. Data

139 analysis was performed using QuantAnalysis 2.0 software (Bruker Daltonik).

140

- 141 1. Huang Y, McClenaghan C, Harter TM, Hinman K, Halabi CM, Matkovich SJ, et al.  
142 Cardiovascular consequences of KATP overactivity in Cantu syndrome. *JCI insight*.  
143 2018;3(15).
- 144 2. Malester B, Tong X, Ghiu I, Kontogeorgis A, Gutstein DE, Xu J, et al. Transgenic  
145 expression of a dominant negative K(ATP) channel subunit in the mouse endothelium:  
146 effects on coronary flow and endothelin-1 secretion. *FASEB J*. 2007;21(9):2162-72.

- 147 3. Wirth A, Benyo Z, Lukasova M, Leutgeb B, Wettschureck N, Gorbey S, et al. G12-G13-  
148 LARG-mediated signaling in vascular smooth muscle is required for salt-induced  
149 hypertension. *Nat Med*. 2008;14(1):64-8.
- 150 4. Schugar RC, Moll AR, Andre d'Avignon D, Weinheimer CJ, Kovacs A, and Crawford PA.  
151 Cardiomyocyte-specific deficiency of ketone body metabolism promotes accelerated  
152 pathological remodeling. *Mol Metab*. 2014;3(7):754-69.
- 153 5. Cheng SL, Behrmann A, Shao JS, Ramachandran B, Krcma K, Bello Arredondo Y, et  
154 al. Targeted reduction of vascular Msx1 and Msx2 mitigates arteriosclerotic calcification  
155 and aortic stiffness in LDLR-deficient mice fed diabetogenic diets. *Diabetes*.  
156 2014;63(12):4326-37.
- 157 6. Gomori G. A rapid one-step trichrome stain. *Am J Clin Pathol*. 1950;20(7):661-4.
- 158 7. Lahmann C, Kramer HB, and Ashcroft FM. Systemic Administration of Glibenclamide  
159 Fails to Achieve Therapeutic Levels in the Brain and Cerebrospinal Fluid of Rodents.  
160 *PLoS One*. 2015;10(7):e0134476.
